# Supplementary material for: RNF144A-AS1, a TGF-β1- and hypoxia-inducible gene that promotes tumor metastasis and proliferation via targeting the miR-30c-2-3p/LOX axis in gastric cancer
Source: PubMed Central journal article supplement (PMC8480077; doi:10.1186/s13578-021-00689-z), 2021-09-28
Supplement: 13578_2021_689_MOESM4_ESM.pdf [file 13578_2021_689_MOESM4_ESM.pdf]

## RNF144A-AS1, a TGF- $\beta$ 1- and hypoxia-inducible gene that promotes tumor metastasis and proliferation via targeting the miR-30c-2-3p/LOX axis in gastric cancer

Additional files: Supplementary Figures

Additional file 4: Figure S1

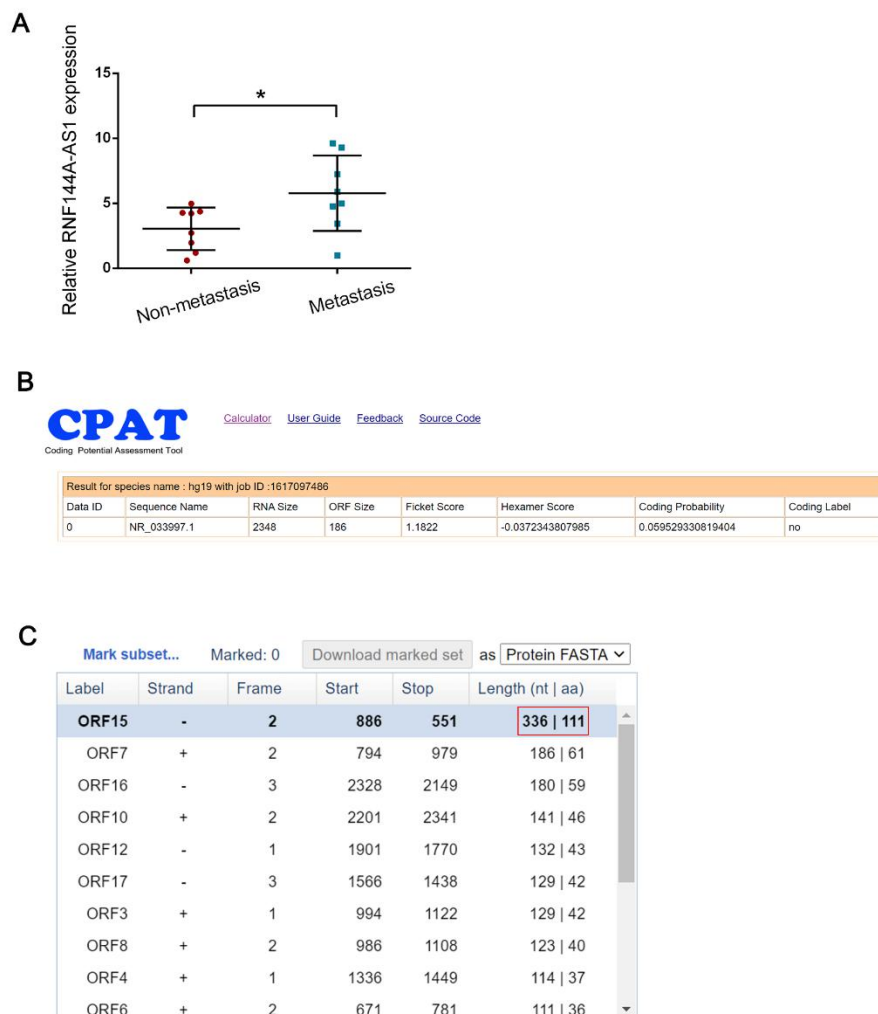

**Figure S1 RNF144A-AS1 preserved non-coding feature.** **A** Analysis of RNF144A-AS1 expression in tumor tissues with or without distant metastasis ( $n = 8$  for each group). **B** The coding potential of RNF144A-AS1 was low from CAPT. **C** Prediction of coding potential to RNF144A-AS1 using ORF finder.  $*P < 0.05$  by Student's t-test unless otherwise specified.
