# Supplementary material for: RNF144A-AS1, a TGF-β1- and hypoxia-inducible gene that promotes tumor metastasis and proliferation via targeting the miR-30c-2-3p/LOX axis in gastric cancer
Source: PubMed Central journal article supplement (PMC8480077; doi:10.1186/s13578-021-00689-z), 2021-09-28
Supplement: 13578_2021_689_MOESM5_ESM.pdf [file 13578_2021_689_MOESM5_ESM.pdf]

Additional file 5: Figure S2

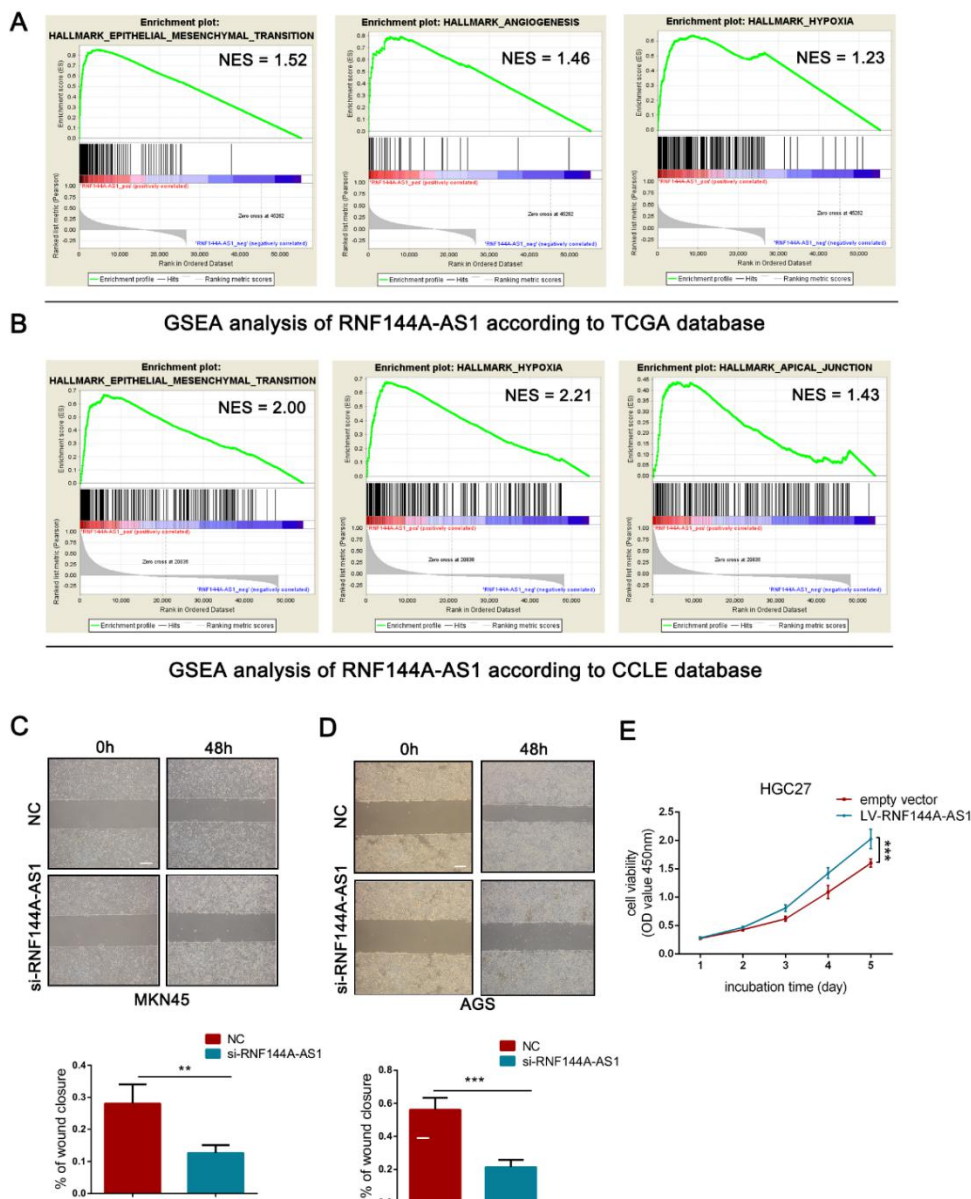

**Figure S2 GSEA analysis of RNF144A-AS1 and the function of RNF144A-AS1 in GC cells.** **A** GSEA analysis of RNF144A-AS1 based on gene expression data extracted from the TCGA database. **B** GSEA analysis of RNF144A-AS1 based on gene expression data extracted from the CCLE database. **C-D** Cell motility was

examined in treated MKN45 (C) and AGS (D) cells by wound-healing assays. Scale bars = 200  $\mu$ m. E Cell growth of HGC27 cells treated by RNF144A-AS1 vector or control. Data were analyzed using two-way ANOVA. Error bars, mean  $\pm$  SD from triplicate samples.  $**P < 0.01$ ,  $***P < 0.001$  by Student's t-test unless otherwise specified.
