# Supplementary material for: RNF144A-AS1, a TGF-β1- and hypoxia-inducible gene that promotes tumor metastasis and proliferation via targeting the miR-30c-2-3p/LOX axis in gastric cancer
Source: PubMed Central journal article supplement (PMC8480077; doi:10.1186/s13578-021-00689-z), 2021-09-28
Supplement: 13578_2021_689_MOESM6_ESM.pdf [file 13578_2021_689_MOESM6_ESM.pdf]

Additional file 6: Figure S3

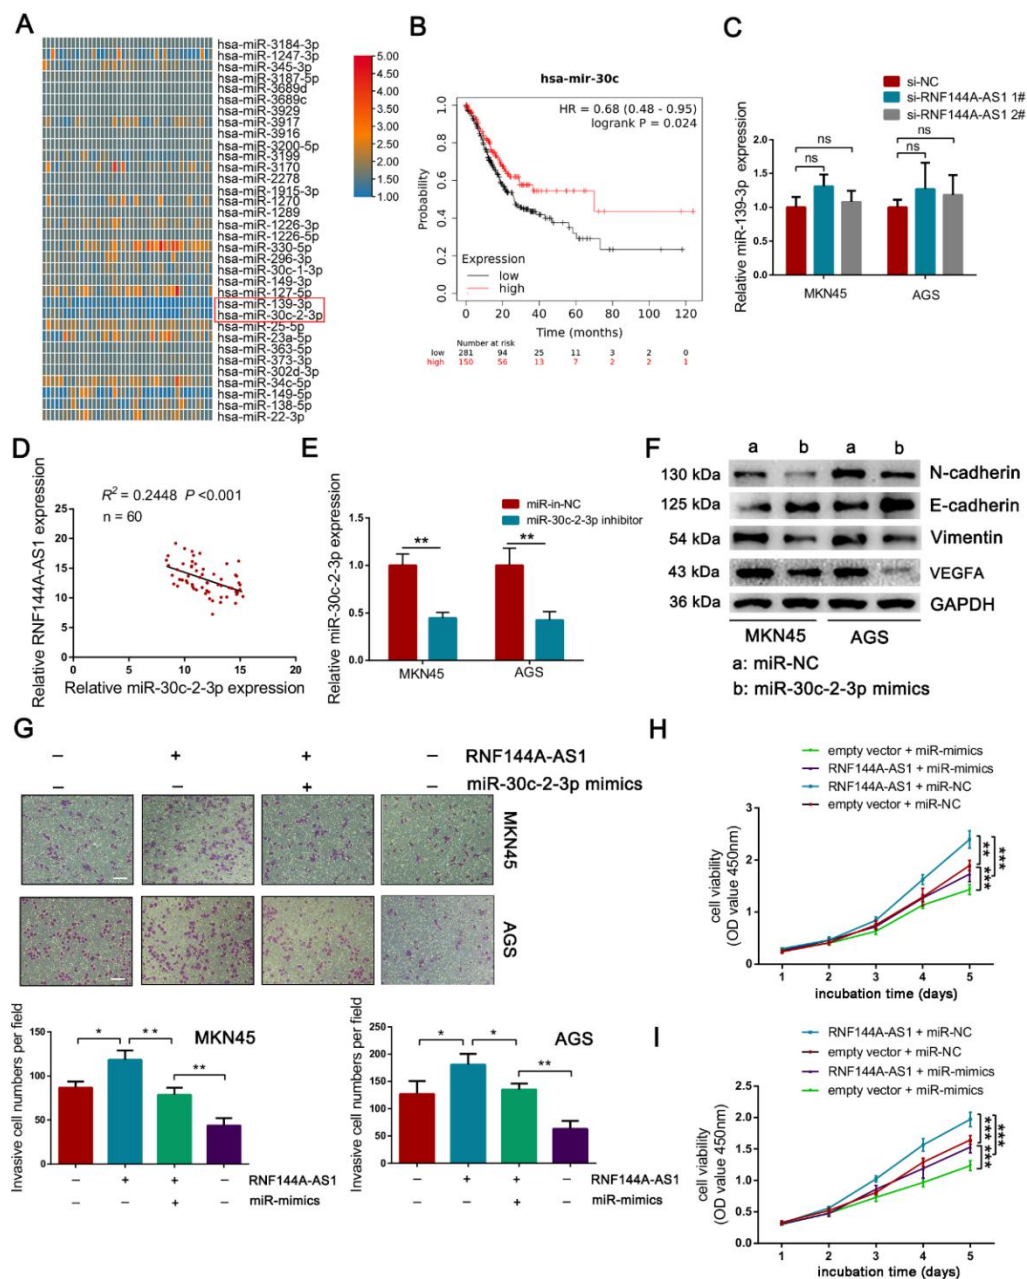

**Figure S3 MiR-30c-2-3p was the target of RNF144A-AS1.** **A** Heat map presentation of the expression level of predicted miRNAs in 41 paired GC tissues from the TCGA database. The red shades represent high expression, and the blue shades represent a low expression. **B** Kaplan-Meier curves of miR-30c according to

TCGA database. *P*-value from log-rank test. **C** The expression of miR-139-3p in GC cells transfected with siRNAs against RNF144A-AS1 or control. **D** Pearson correlation analysis between RNF144A-AS1 and miR-30c-2-3p in 60 GC tissues. **E** Expression of miR-30c-2-3p in GC cells treated by miR-30c-2-3p inhibitor or control. **F** The protein level of EMT-related markers and VEGFA as indicated. **G** Cellular invasion of GC cells co-transfected with miRNA mimics and RNF144A-AS1 vector. Scale bars = 100  $\mu$ m. **H-I** Cell proliferation rate detected by CCK8 assays in MKN45 (**H**) and AGS (**I**) cells as indicated. Data were analyzed using two-way ANOVA. Error bars, mean  $\pm$  SD from triplicate samples. \**P* < 0.05, \*\**P* < 0.01 by Student's *t*-test unless otherwise specified.
