# Supplementary material for: RNF144A-AS1, a TGF-β1- and hypoxia-inducible gene that promotes tumor metastasis and proliferation via targeting the miR-30c-2-3p/LOX axis in gastric cancer
Source: PubMed Central journal article supplement (PMC8480077; doi:10.1186/s13578-021-00689-z), 2021-09-28
Supplement: 13578_2021_689_MOESM8_ESM.pdf [file 13578_2021_689_MOESM8_ESM.pdf]

## Additional file 8: Figure S5

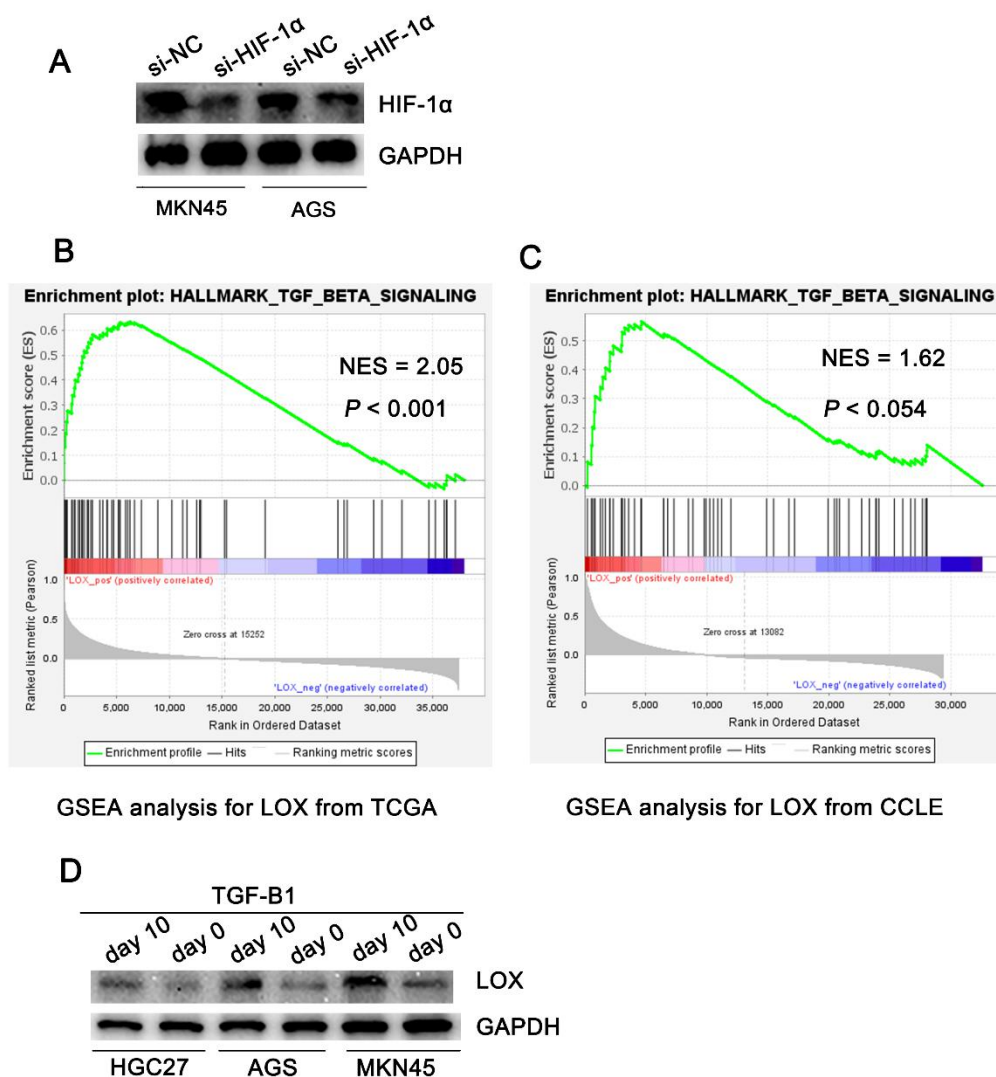

**Figure S5 The effect of TGF- $\beta$ 1 on LOX expression.** **A** HIF-1 $\alpha$ -specific siRNA efficiently inhibited the expression of HIF-1 $\alpha$  in GC cells. **B-C** Enrichment plots of LOX with TGF- $\beta$  signaling from the expression data of TCGA database (**B**) and CCLE database (**C**). **D** Western blot analysis of LOX expression in GC cells treated with recombinant human TGF- $\beta$ 1 or not.
